# Supplementary material
Source: PubMed Central journal article supplement (PMC3479524)
Supplement: 1205156109_pnas.201205156SI.pdf [file 1205156109_pnas.201205156SI.pdf]

# Supporting Information

Nakamichi et al. 10.1073/pnas.1205156109

## SI Materials and Methods

**Plant Materials and Growth Conditions.** Ecotype accession Columbia-0 (Col-0) was used for the wild-type in this study. *prp9 prp7 prp5* triple mutants, *PRR5pro:FLAG-PRR5-GFP/prp5*, *PRR7pro:FLAG-PRR7-GFP/prp7*, *PRR9pro:FLAG-PRR9-GFP/prp9*, and *PRR5-ox* was reported previously (1–3). To generate *35Spro:PRR5-FLAG* plants, the coding region of *PRR5* (*PSEUDO-RESPONSE REGULATORY 5*) was amplified using primers (5'-CACCATGAC-TAGTAGCGAGGAAG-3' and 5'-TGGAGCTTGTGTGGAT-TGGAC-3') with Prime Star DNA polymerase (Takara). Amplified DNA was cloned into pENTR/D-TOPO (Invitrogen) to construct an entry plasmid pENTR/D-PRR5. The plasmid was treated with Gateway LR clonase enzyme (Invitrogen) to generate pBS-PRR5-FLAG using pBS-FLAG GW (in which the *35S CaMV* promoter, Gateway reading frame cassette, *3-FLAG*, and *NOS* terminator were assembled 5' to 3' in pBlueScript) as a destination vector. The *PRR5-FLAG* region of pBS-PRR5-FLAG was then amplified using primers (5'-CACGGGGACTCTAGAATG-ACTAGTAGCGAGGAAG-3', and 5'-TTCGAGCTGCGGC-CGCTTACTTGTCTCATCGTCTTTG-3'), and cloned into the binary vector pSK1, in which a gene is driven under the control of *35S CaMV* promoter (4), between the XbaI and NotI sites using an In-Fusion HD kit (Takara), generating pSK1-PRR5-FLAG. To create *PRR5mtA* and *PRR5mtB*, a Quick Change Site-Directed Mutagenesis Kit (Agilent Technologies) was used with the appropriate primer sets and pENTR/D-PRR5 (for *PRR5mtA*; 5'-CGAGAGCCGGAAGAAATTAGTAGAGCAACGACCAC-GAATCAAAG-3', and 5'-CTTTGATTTCGTGGTCTGTTGCT-CTACTAATTTCTTCCGGCTCTCG-3', for *PRR5mtB*; 5'-GA-AATTAGCAGAGCAACGACCACACTCAAAGCCAAT-TCGTTTCG-3', 5'-CGAAGCAATTGGCCCTTTGATGTGGT-CGTTGCTCTGCTAATTTTC-3'). Resultant pENTR/D-PRR5mtA or pENTR/D-PRR5mtB was then used to make pBS-PRR5mtA-FLAG, pSK1-PRR5mtA-FLAG, pBS-PRR5mtB-FLAG, and pSK1-PRR5mtB-FLAG. To generate the *PRR5-VP* fusion construct, *PRR5* coding sequence was integrated into the pBS-35S-VP vector (in which the *35S CaMV* promoter, Gateway reading frame cassette, two copies of *VPI6*, and *NOS* terminator were assembled 5' to 3' in pBlueScript) using LR clonase. *PRR5-VP* region was then amplified using primers (5'-CACGGGGGAC-TCTAGAATGACTAGTAGCGAGGAAG-3', and 5'-TTCGA-GCTGCGGCCCGCTACCCACCGTACTC-3'), and cloned into pSK1 between the XbaI and NotI sites using an In-Fusion HD kit (pSK1-PRR5-VP). The binary vectors were used to transform Col-0 via an *Agrobacterium*-mediated method (5). Ten independent T1 transformants were selected, and Western blotting was performed at the T2 generation to verify that transgenic plants expressing exogenous protein. Two independent T2 plants were selected and used for further analyses. Plants were grown on MS (6) containing 2% (wt/vol) sucrose and 0.3% gellan gum with or without 20  $\mu\text{g}\cdot\text{L}^{-1}$  of Hygromycin B, under 12-h white light/12-h dark conditions (70  $\mu\text{mol}\cdot\text{s}^{-1}\cdot\text{m}^{-2}$ ).

**Transient Transfection Assays and Detection of Luciferase Activity in *Arabidopsis* Seedlings.** Transient assays and detection of luciferase activity were performed as described previously (2). To generate effector plasmids harboring truncated *PRR5* (#1~#4), *PRR9*#3 and *PRR7*#3, the corresponding regions were cloned into pENTR/D-TOPO and integrated into pBS-FLAG GW using LR clonase. The truncated *PRR5*, *PRR9*, and *PRR7* regions are: *PRR5*#1 (extending from Met of 1 to Phe of 180), *PRR5*#2 (Met of 1 to Gly of 501), *PRR5*#3 (Thr of 173 to Pro of 558), *PRR5*#4 (His of 328

to Pro of 558), *PRR7*#3 (Trp of 197 to Ser of 727), and *PRR9*#3 (Trp of 156 to Ser of 468). Note that a Met codon was added at the 5' terminus of *PRR5*#3, *PRR5*#4, *PRR7*#3, and *PRR9*#3. The procedures used to generate pBS-PRR5mt-FLAG and pBS-PRR5-VP are described in *Plant Materials and Growth Conditions*, above.

**ChIP-Seq Analysis.** Eight grams of *PRR5pro:FLAG-PRR5-GFP/prp5* plants were harvested at Zeitgeber time (ZT) 12 and fixed in 300 mL of 1% (vol/vol) formaldehyde under vacuum for 40 min. The reaction was stopped by washing twice with ice-cold 0.3 M glycine. Plants were stored at  $-80^\circ\text{C}$  until use. Two grams of frozen plant material were then ground into powder in liquid nitrogen and lysed in 40 mL of nuclear isolation buffer [1 M hexylene glycol, 50 mM Tris-HCl pH 7.5, 10 mM  $\text{MgCl}_2$ , 0.5% Tritone X-100, 5 mM 2-mercaptoethanol, protease inhibitor mixture (P9599; Sigma-Aldrich), 50  $\mu\text{M}$  26S protease inhibitor MG132 (C2211; Sigma-Aldrich)]. Nuclei were separated by filtration through a 125- $\mu\text{m}$  filter and Miracloth (Calbiochem). Isolated nuclei were suspended in 6 mL of lysis buffer (50 mM Tris-HCl pH 7.5, 100 mM NaCl, 0.1% Triton X-100, 50  $\mu\text{M}$  MG132, and protease inhibitor mixture), and sonicated. Immunoprecipitation of FLAG-PRR5-GFP by anti-GFP antibody, and isolation of ChIP DNA were performed as described previously (2). ChIP DNA and input DNA were processed to generate a DNA library for deep sequencing as described (7). The resulting ChIP and input DNA libraries were sequenced with an Illumina Genome Analyzer (GA) II (Fig. S2).

**ChIP-Seq Data Analysis.** Basecalls of sequence reads were done by the Illumina GA II pipeline. To map sequence reads on the *Arabidopsis* genome, ChIP and input DNA sequence data in the FASTQ format were analyzed by CLC-bio Genomics Workbench (CLC bio) against the reference genome TAIR9. Peaks significantly appearing in ChIP DNA compared with the input [false-discovery rate (FDR)  $q < 10^{-50}$ ] were annotated as binding loci of *PRR5* (a total of 542 loci). Model-based Analysis of ChIP-Seq (MACS 2) was used for validating forward- and reverse-peak distribution (8). The data for MACS2 was drawn by R ([www.r-project.org](http://www.r-project.org)). Peaks from forward and reverse strands were within 200 bp, indicating that DNA fragment sizes in the ChIP library were acceptable, and that *PRR5-GFP* associates within a very close region of these peaks (Fig. S3). Five-hundred thirty-six genes have *PRR5*-bound loci within 5 kbp 5' to corresponding putative transcription start site, 346 genes have bound loci within 5 kbp 3' from the termination codon, and 170 genes have bound loci within the coding region (Fig. S3). Mapping reads (bam format from CLC-bio data analysis) were visualized with Integrative Genomics Viewer ([www.broadinstitute.org/igv](http://www.broadinstitute.org/igv)).

**Microarray Analysis.** Samples were harvested from wild-type and *PRR5-VP*-expressing plants grown under 12-h light/12-h dark conditions at ZT12, and total RNA was prepared from three biological replicates with an RNeasy Plant Mini Kit (Qiagen). The RNA samples were subjected to microarray analyses as described previously (9). Row CEL files were normalized by Robust Multi-array Average algorithm (10) with Bioconductor Simpleaffy package 2.10 in R ([www.r-project.org](http://www.r-project.org)) (11). Genes whose signal intensities were significantly changed (FDR  $q < 0.01$ ) compared with wild-type were identified. Heat maps in Figs. 3 and 4 were generated by R ([www.r-project.org](http://www.r-project.org)), as described previously (12). The detection call for genes ("present", "marginal," and "absent") were used for validation for signal intensity of each gene. If a dataset is called "absent" for all samples, the gene was regarded as

invalidated in the dataset. Accessions numbers of microarray data are National Center for Biotechnology Information (NCBI) Gene Expression Omnibus (GEO) GSE3416 for LDHH\_ST (Fig. 3A) (13), NASCARRAYS-60 for LDHH\_SM (Fig. 3B) (14), GSE8365 for LL12\_LDHH (Fig. 3C) (15), NASCARRAYS-108 for LL23\_LDHH (Fig. 3D) (16), NASCARRAYS-421 for *prr9 prr7 prr5* (Fig. 4D) (9), and NASCARRAYS-420 for *PRR5-ox* (Fig. S10). In Fig. 3, signal intensities for *At1g02340*, *At1g09350* (*ATGOLS3*), *At3g19270* (*CYP707A4*), *At3g62690* (*ATL5*), *At4g25470* (*DREB1C/CBF2*), *At4g25490* (*DREB1B/CBF1*), *At4g36700*, *At5g15940*, and *At5g54470* (*BBX29*) were invalid in the LDHH\_ST dataset (Fig. 4A). Signal intensities for *At1g18330*, *At1g69570* (*CDF5*), *At2g46790* (*PRR9*), *CYP707A4*, *DREB1B/CBF1*, *At4g36700*, and *At5g15940* were invalid in the LDHH\_SM dataset (Fig. 4B). Signal intensities for *ATGOLS3*, *CDF5*, *CYP707A4*, *At3g55580* (*RCC1*), *DREB1B/CBF1*, *At5g15940*, and *BBX29* were invalid in the LL12\_LDHH dataset (Fig. 4C). Signal intensities for *ATGOLS3*, *At1g18330*, *CDF5*, *PRR9*, *CYP707A4*, *RCC1*, *At3g62690* (*ATL5*), *DREB1C/*

*CBF2*, *DREB1B/CBF1*, *At5g15490*, and *BBX29* were invalid in the LL23\_LDHH dataset (Fig. 4D).

**RT-Quantitative PCR.** Seedlings were grown on MS plate containing 2% sucrose, under 12-h light and 12-h dark conditions for 18 d and released into constant light of  $70 \mu\text{mol}\cdot\text{s}^{-1}\cdot\text{m}^{-2}$ . RNA was isolated with an RNeasy Plant Mini Kit. RT-quantitative PCR (RT-qPCR) was done as described previously (2) using Applied Biosystems StepOnePlus Real-Time PCR system (Life Technologies). Primer sets used in this study was shown in [Dataset S5](#).

**Flowering-Time Measurement.** Flowering time was counted as described previously (17).

**Elucidation of Enriched DNA Sequences in ChIP-DNA.** DNA sequences of 500-bp length around peak reads near the PRR5 direct targets were sorted and identified with the MEME-ChIP open Web tool which finds common patterns in input DNA sequences ([meme.sdsc.edu/meme/intro.html](http://meme.sdsc.edu/meme/intro.html)).

- Nakamichi N, Kita M, Ito S, Yamashino T, Mizuno T (2005) PSEUDO-RESPONSE REGULATORS, PRR9, PRR7 and PRR5, together play essential roles close to the circadian clock of *Arabidopsis thaliana*. *Plant Cell Physiol* 46:686–698.
- Nakamichi N, et al. (2010) PSEUDO-RESPONSE REGULATORS 9, 7, and 5 are transcriptional repressors in the *Arabidopsis* circadian clock. *Plant Cell* 22:594–605.
- Sato E, Nakamichi N, Yamashino T, Mizuno T (2002) Aberrant expression of the *Arabidopsis* circadian-regulated APRR5 gene belonging to the APRR1/TOC1 quintet results in early flowering and hypersensitiveness to light in early photomorphogenesis. *Plant Cell Physiol* 43:1374–1385.
- Kojima S, et al. (1999) A binary vector plasmid for gene expression in plant cells that is stably maintained in *Agrobacterium* cells. *DNA Res* 6:407–410.
- Bechtold N, Ellis J, Pelletier G (1993) In planta *Agrobacterium* mediated gene transfer by infiltration of adult *Arabidopsis thaliana* plants. *C R Acad Sci* 316:1194–1199.
- Murashige T, Skoog F (1962) A revised medium for rapid growth and bio-assays with tobacco tissue culture. *Physiol Plant* 15:473–497.
- Kaufmann K, et al. (2010) Chromatin immunoprecipitation (ChIP) of plant transcription factors followed by sequencing (ChIP-Seq) or hybridization to whole genome arrays (ChIP-CHIP). *Nat Protoc* 5:457–472.
- Zhang Y, et al. (2008) Model-based analysis of ChIP-Seq (MACS). *Genome Biol* 9:R137.
- Nakamichi N, et al. (2009) Transcript profiling of an *Arabidopsis* PSEUDO RESPONSE REGULATOR arrhythmic triple mutant reveals a role for the circadian clock in cold stress response. *Plant Cell Physiol* 50:447–462.
- Irizarry RA, et al. (2003) Exploration, normalization, and summaries of high density oligonucleotide array probe level data. *Biostatistics* 4:249–264.
- de Hoon MJ, Imoto S, Nolan J, Miyano S (2004) Open source clustering software. *Bioinformatics* 20:1453–1454.
- Fukushima A, et al. (2009) Impact of clock-associated *Arabidopsis* pseudo-response regulators in metabolic coordination. *Proc Natl Acad Sci USA* 106:7251–7256.
- Bläsing OE, et al. (2005) Sugars and circadian regulation make major contributions to the global regulation of diurnal gene expression in *Arabidopsis*. *Plant Cell* 17:3257–3281.
- Smith SM, et al. (2004) Diurnal changes in the transcriptome encoding enzymes of starch metabolism provide evidence for both transcriptional and posttranscriptional regulation of starch metabolism in *Arabidopsis* leaves. *Plant Physiol* 136:2687–2699.
- Covington MF, Harmer SL (2007) The circadian clock regulates auxin signaling and responses in *Arabidopsis*. *PLoS Biol* 5:e222.
- Edwards KD, et al. (2006) FLOWERING LOCUS C mediates natural variation in the high-temperature response of the *Arabidopsis* circadian clock. *Plant Cell* 18:639–650.
- Nakamichi N, et al. (2007) *Arabidopsis* clock-associated pseudo-response regulators PRR9, PRR7 and PRR5 coordinately and positively regulate flowering time through the canonical CONSTANS-dependent photoperiodic pathway. *Plant Cell Physiol* 48:822–832.



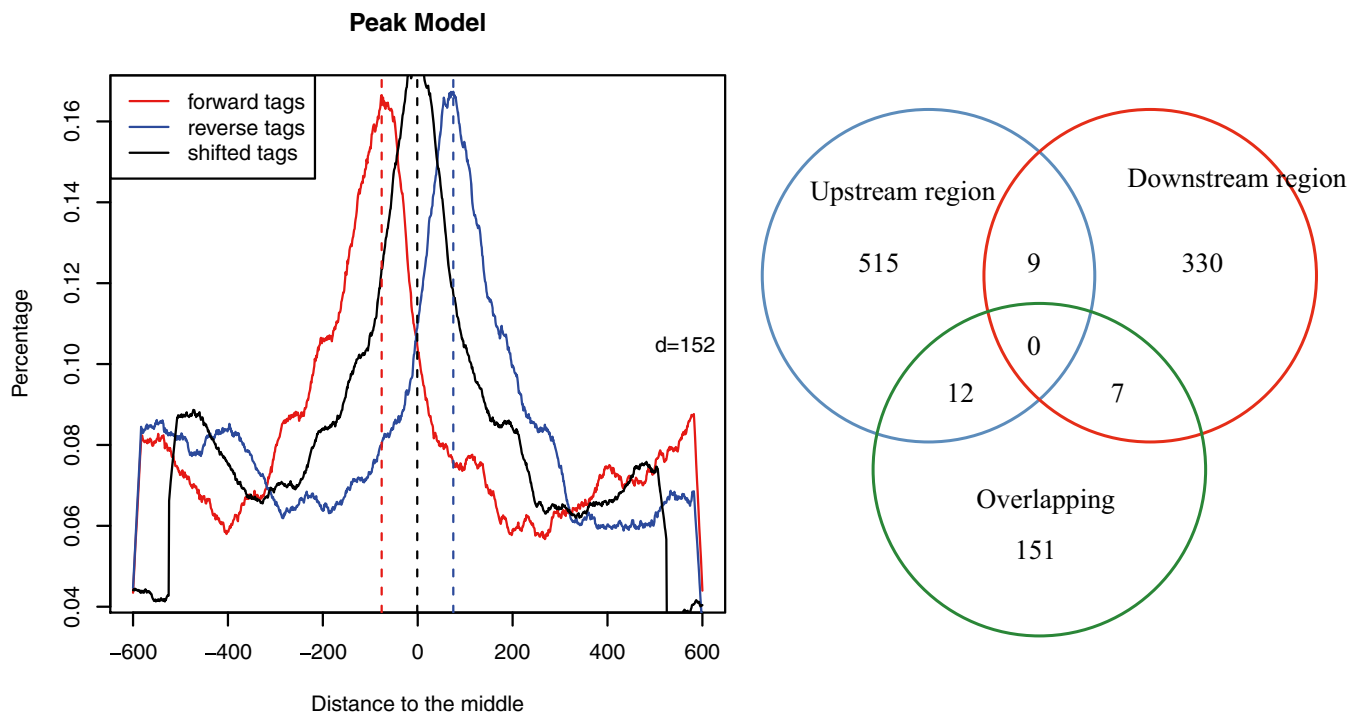

**Fig. S3.** Peak model for ChIP DNA library and location of the peak relative to the gene. The 5' ends of sequence reads in all peaks were aligned by the center of forward and reverse strands (*Left*). "d" indicates the distance between the modes of the forward and reverse peaks. Venn diagram for peak location relative to the gene-model (TAIR9) (*Right*). Upstream, downstream, and overlapping indicates a gene having peaks for reads in ChIP within 5 kbp of 5' side of relative to its TSS, a gene having peaks for reads in ChIP within 5 kbp of 3' side of relative to its stop codon, and a gene having peaks within the coding sequence, respectively.















#### **Dataset S4. Shared targets of PRR5 and TOC1**

##### [Dataset S4](#)

The common genes between PRR5-targets and TOC1-targets are listed.

#### **Dataset S5. Primers used for CHIP-qPCR and RT-qPCR**

##### [Dataset S5](#)

TSS indicates transcription start site according to TAIR9.
